# Supplementary material for: Spatial variability and future evolution of surface solar radiation over Northern France and Benelux: a regional climate model approach
Source: Copernicus journal article supplement (doi:10.5194/egusphere-2024-1174), 2024-05-08
Supplement: Supplementary file [file egusphere-2024-1174-AC1-supplement.pdf]

Dear Referee #1,

Thank you for your suggestions and remarks. Consideration of these comments has helped to improve the manuscript. Below you will find the answers to each comment.

### **General comments**

*The manuscript “Spatial variability and future evolution of surface solar radiation over Northern France and Benelux: a regional climate model approach” evaluates the performance of the regional climate model CNRM-ALADIN64 comparing the model outputs of different variables with observed values. After the conclusion that the model shows reasonable agreement with observational data, the authors use the output of the model to investigate the spatial variability of surface solar radiation (SSR) in the Benelux region in the recent past, and for two different future scenarios in the mid term and long term. The manuscript is mostly well organized, makes use of valid methods using mostly reasonable assumptions and address relevant scientific questions within the scope of the journal. At the present form, I think there are still several points that could be improved or better discussed, but I believe it could be suited for publication after major revisions*

*For the analysis of the future evolution of SSR the authors compare the average values of the historical period to mid term and long term scenarios, rather than showing a time series or depicting the SSR change in terms of “trends per decade”, as done by most studies in the topic. However, the approach in the study is also perfectly valid and comprehensible, given that special focus is given to the spatial contrasts. For this analysis, the authors focused only in the spring and summer months. I understand the reasoning on why the authors chose to focus on these months, but I do not think this is the best approach if the intent is to discuss the whole picture of future evolution, as I expected from the title of the manuscript. I also believe some improvement could be done in the evaluation of simulated surface solar radiation (section 3.2). At the present form of the manuscript the evaluation is done in terms of the monthly mean absolute SSR values only, and that is dominated by the seasonality. Therefore, this does not provide a strong tool for evaluation of other components of the time series, such as trend and irregular variability (anomalies). In the specific comments I comment in more details these and other minor concerns.*

### **Specific comments**

*Lines 22-23: here you basically mention the three major aspects that affect long term SSR variability. I don’t know if there is space in the abstract, but I*

**would include a few words to just highlight if each of them is more relevant than the other.**

The end of the abstract has been modified to take into account this comment.

The new sentences describe more accurately our results (see lines 20-25 of the revised manuscript):

"The reductions are maximum in spring due to combined effects of higher cloud cover and nitrate aerosol increases over the Benelux starting in 2050. In summer, cloud cover upcoming decreases largely attenuate the reduction of SSR due to aerosols in 2050, while in 2100 this attenuation is offset by strong water vapor increases. Thus, this regional climate model approach highlights seasonally and spatially variable impacts of future anthropogenic aerosol emissions on SSR evolution over the 21st century. Indeed, over this part of western Europe, cloud cover and water vapor modifications will likely largely contribute to modulate forthcoming aerosol influences."

***Lines 34-45: My understanding of the structure of the introduction was: first paragraph - SSR is important and presents variability; second paragraph - previous literature on SSR variability; third paragraph - puts the manuscript and the region of study in the context; and fourth paragraph - structure of the manuscript. If this is more or less your intention, I think the second paragraph (lines 34-45) could present more literature that discusses SSR changes and their causes in Europe or optimally in or around the region of study. Maybe the review paper by Wild (2009) [<https://doi.org/10.1029/2008JD011470>] is a good start, but newer papers should be available too. At the moment I have the feeling that this paragraph discussed only projecting SSR, but before talking about the ability to make accurate projects of SSR, it is important to discuss the physical processes too.***

Following the referee's advice, the second paragraph of the introduction has been modified to include more literature about past SSR changes and their causes, especially in Europe (see lines 38-49 of the revised manuscript).

The added paragraph is included below:

"Numerous studies conducted in recent decades, utilizing both observations and modeling, indicate that surface solar radiation has been subject to significant decadal variations in the past, with a worldwide decreasing (dimming) trend until the 1990s, and conversely an increasing (brightening) trend from then onwards (Wild et al., 2005; Wild, 2009; Liepert, 2002; Norris and Wild, 2007). Determining the causes of these trends has been challenging due to the complex interplay of various forcing agents, which directly affect SSR variability through scattering and absorption, and also alter atmospheric dynamics and cloud formation. In Europe, an increasing

number of studies suggest that the rise in all-sky radiation since around 1985 is attributable to changes in cloud cover and anthropogenic aerosol emissions (Schwarz et al., 2020; Boers et al., 2017; Dong et al., 2022; Wild et al., 2021). However, it should be noted that due to the high spatial and temporal variability of clouds and aerosols, their influence and the resulting trends in SSR, exhibit strong spatiotemporal variations that require further investigation. Pfeifroth et al. (2018) notably show that, over 1992-2015, maximum positive trends occur in spring and autumn across western, central and eastern Europe, whereas the winter season and southern Europe exhibit weaker increases or even negative trends in SSR.”

**Figure 3: Would be interesting to also include a third line (or a bar) in each plot showing the difference between the two different estimates.**

A bar plot has been added to each panel of Figure 3 to represent the monthly difference between the two estimates (see Figure 3 of the revised manuscript). Additionally, complementary comments regarding the absolute differences between these estimates have been added to the text (see lines 320-323 of Section 3.1.2).

Similar changes have also been applied to Figures S1, S2 and S3 (now Figures S2, S3 and S4) as they are quite similar to Figure 3.

**Section 3.2: The evaluation of the simulated SSR is made by comparing the monthly mean absolute values of direct, diffuse and global components of SSR. However, I do not think this is a complete way of evaluating the SSR representation by the model. For me, the actual evaluation shows that the model can well capture the seasonality. Which is good. But if the model will be used to investigate the future evolution of SSR, we have to also be able to evaluate the model’s ability to represent trends and anomalies. For example, in line 332 the authors mention that ALADIN underestimates the direct component in spring by around -20 to -40 W/m<sup>2</sup>. Such an underestimation represents less than 10% for the absolute SSR of those months, but such a difference could have a much bigger relevance if we would be evaluating in terms of anomalies. Therefore, I think it is important to somehow evaluate the time series with its different components, not only the seasonality.**

In response to the referee’s comment a new section (Section 3.4), titled “Monthly time series over 2010-2020”, has been added to the revised manuscript (see pages 18 to 20).

This section describes comparisons of the monthly time series of daytime (a) clear-sky frequency, (b) all-sky surface solar radiation and (c) aerosol optical depth at 550 nm in Lille over the period 2010-2020. As the period 2010-2020 is too brief to precisely assess ALADIN’s ability to represent observed trends, this section focuses on the analysis of monthly and seasonal anomalies recorded during 2010-2020.

Comparisons of aerosol surface concentrations are also excluded as PM<sub>1</sub> ground measurements are only available in Lille from 2016 to 2020.

For brevity, only comparisons in Lille are presented in this section (Figures 7a-c, available below), however similar analyses and figures for Cabauw and Palaiseau are available in the supplements (Figs.S4 and S5, respectively, also shown below).

Overall, the results presented in this section highlight that despite specific seasonal biases discussed in Sections 3.1, 3.2 and 3.3, ALADIN simulations correctly transcribe clear-sky frequency, all-sky SSR and AOD inter-annual variabilities over the period 2010-2020.

Our analysis also suggests ALADIN overestimations of the AOD in spring appear to be more frequent over recent years, especially in Lille (Fig. 7c) and Palaiseau (Fig. S6c). This behavior could be related to the general decreasing trend in AOD observed for several European AERONET stations since 1995 (Ningombam et al., 2019), which the model may not capture accurately. Further investigations over longer periods, which are out of the scope of this article, are required to provide more robust conclusions on this topic.

Below are the time series added to the revised version of the manuscript (Figures 7, S4 and S5, respectively).

In addition, a few words have been included in the conclusions (see line 631 of the revised manuscript).

**Reference :** Ningombam, S. S., Larson, E., Dumka, U., Estellés, V., Campanelli, M., and Steve, C.: Long-term (1995–2018) aerosol optical depth derived using ground based AERONET and SKYNET measurements from aerosol aged-background sites, *Atmospheric Pollution Research*, 10, 608–620, <https://doi.org/10.1016/j.apr.2018.10.008>, 2019.

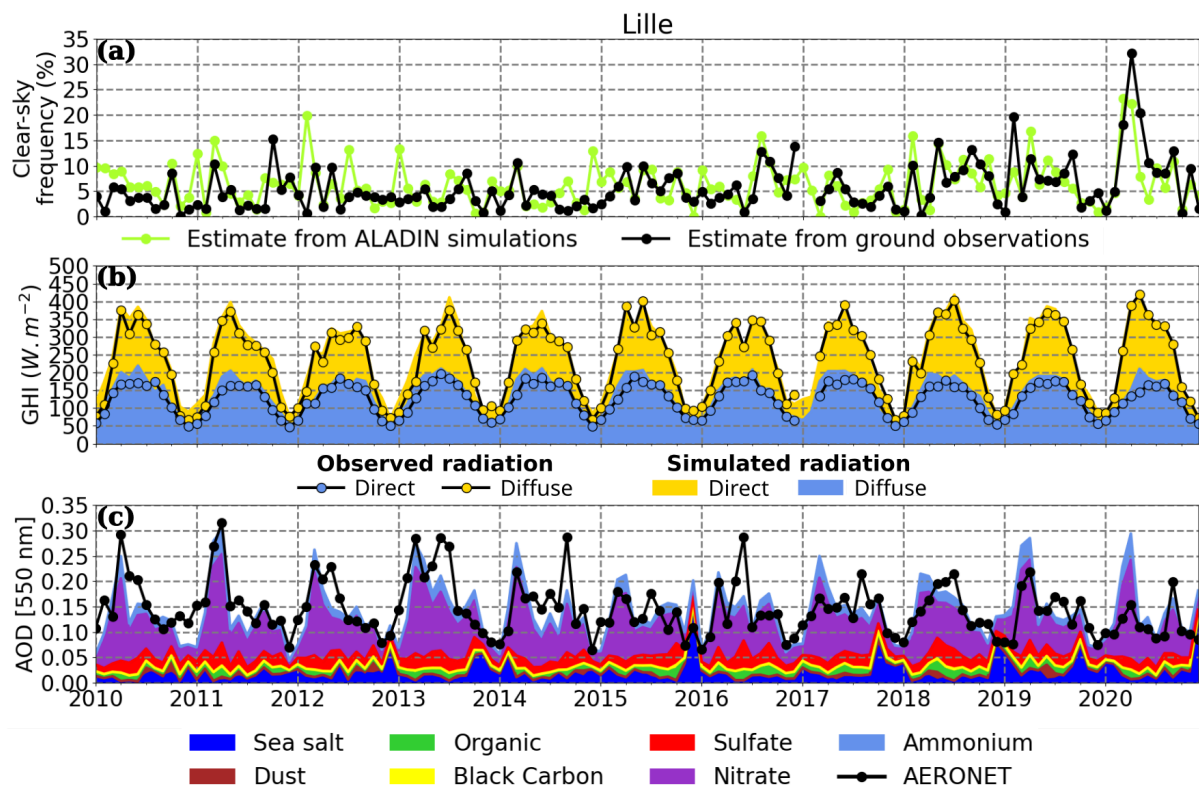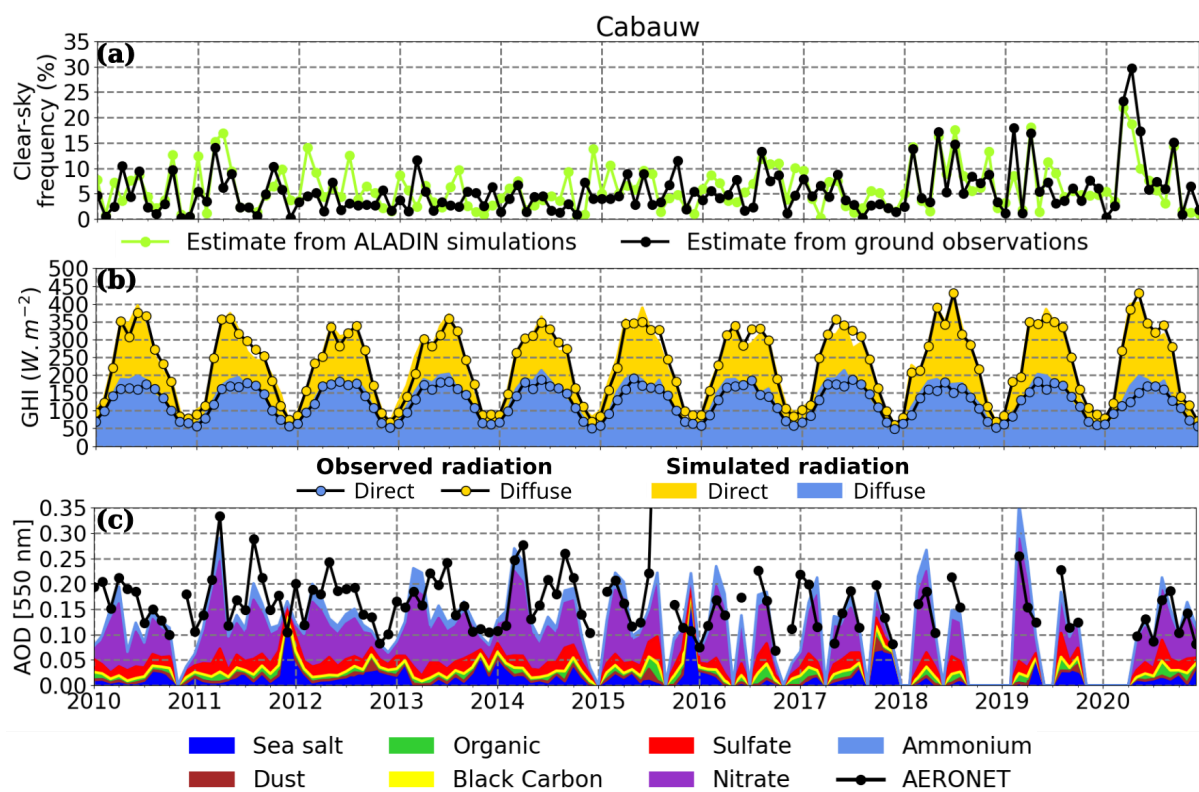



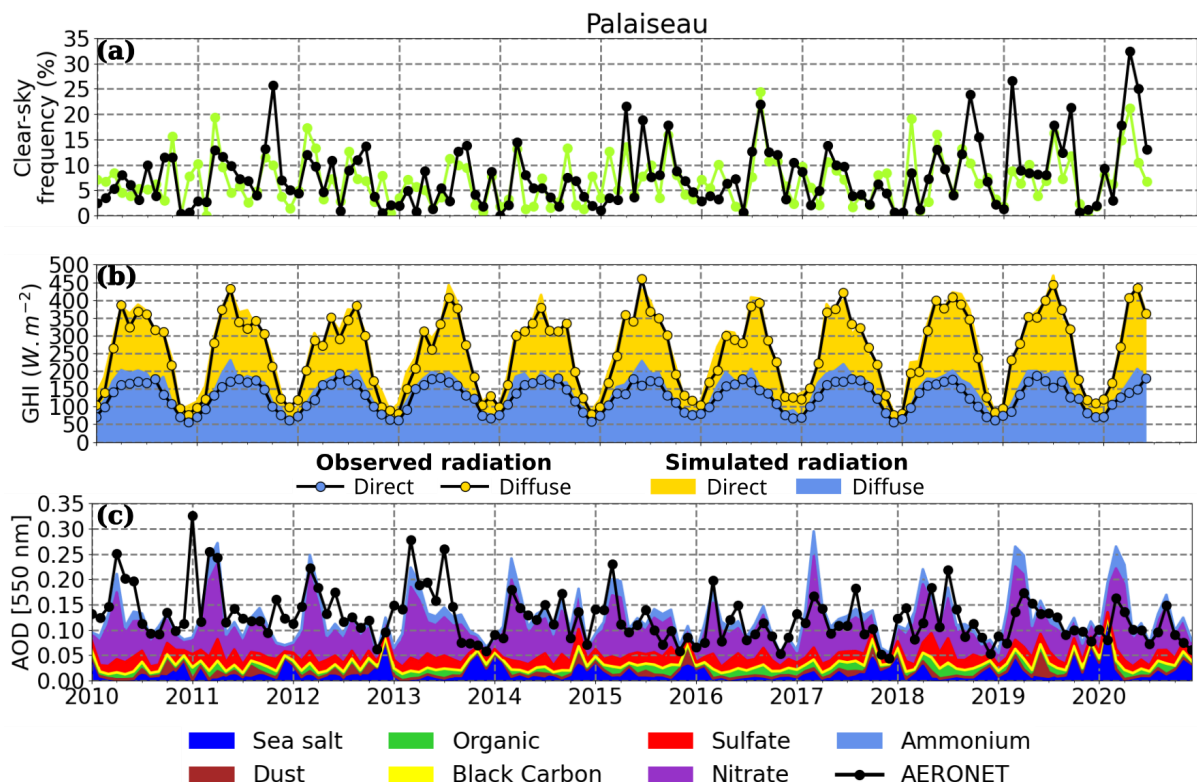

**Line 401-405:** Here the authors justify the use of only spring and summer months in the analysis. First the framing of the argument sounds odd: “our analysis of ground measurements and ALLADIN simulations reveals that spring and summer are both characterized by relatively high SSR values”. That is absolutely correct, but it is framed as if this is a new finding from the analysis, while in fact, relatively high SSR values in summer months are simply a fact for locations at such latitude. Furthermore, omitting half of the year when analyzing future evolution of SSR might lead to the false assumption that the this half of the year is not relevant to the long term SSR variability. In studies like Stern et al. (2009 [<https://doi.org/10.1002/joc.1735>]) and Schilliger et al. (2024

[<https://doi.org/10.22541/essoar.171136948.88001430/v1>]) the authors show contributions from different months for the SSR trends, and in some cases it is possible to identify significant contributions to the long term SSR trends from processes occurring in the winter months. However, I think there are a few alternatives to address this issue. The most obvious, but probably requiring more work, would be to perform the analysis for all four seasons. But an alternative could also to make it more explicit from the beginning (maybe even in the title) that the study analyses only spring and summer months, because the title and the manuscript until this points led me to expect something like an analysis of the entire year. Or even, another alternative could be to include an analysis of annual mean conditions. Maybe the annual conditions follow

***very closely the spring and summer conditions for this regions, and this could make it clear for the reader. In any case, if not all months are included in the analysis, it would be important to discuss that long term SSR changes are not the result of only spring and summer months.***

Indeed, the phrasing of lines 401-405 of the initial manuscript was a bit odd and not particularly well positioned. These lines have been removed. Instead, following the referee's advice, the justifications for our focus on spring and summer seasons are now discussed directly at the end of the introduction (see lines 87-91 of the revised text), as follows:

“In order to allow the evaluation of the influence of aerosol anthropogenic emissions future trajectories on SSR evolution, we focus on spring (i.e. March-April-May) and summer (i.e. June-July-August) seasons. Over the Benelux/Northern France region, both aerosol loads and SSR are maximum at this period of the year, coincidently with more frequent clear-sun conditions, as shown by ground-based measurements analysis (Chesnoiu et al., 2024b).”

The aim of this paragraph is to make clear and justify from the beginning that our analysis of the present and future spatiotemporal variability of the SSR and associated parameters is limited to spring and summer seasons due to their particular irradiation conditions, characterized notably by higher SSR levels, lower cloud influence, and higher aerosol loads, which facilitate the evaluation of the influence of aerosol anthropogenic emissions on SSR variability.

Note that in response to a comment from the second referee, a few sentences have been included in the main text of Section 4.1 (see lines 483-489) to highlight similarities and discrepancies between the spatial variability of the SSR and associated parameters in spring/summer seasons (previously Fig. 7, now Fig. 8) and winter/autumn (Fig. S7). Overall, comparisons between Figures 8 and S7 show similar spatial patterns albeit generally lower AOD and SSR values, and higher cloud fractions. This further asserts the focus of our study on spring and summer seasons due to their particular atmospheric conditions.

***Line 455: Is it possible to estimate the effect of this 2-4% cloud fraction change on SSR values?***

There are two possible approaches that could be employed to perform such an analysis.

Similarly to our approach for AOD and PRW (see lines 517-528 of the revised manuscript), SSR sensitivity to changes in cloud fraction could be used to estimate the effect of the cloud fraction changes on SSR values. However, to the best of our knowledge, no studies from the literature have yet investigated the specific sensitivity of SSR to changes in cloud fraction, making it difficult to apply this approach within the scope of our current work.

Another approach would be to use the model's simulations of SSR and SSR<sub>cf</sub> to derive the overall influence of clouds. This, however, encompasses the influence of not only the cloud fraction, but also the cloud optical depth, and other cloud optical properties. Distinguishing the influence of cloud fraction from other cloud-related parameters, such as cloud optical depth, would require additional data on cloud properties and SSR sensitivity to each parameter—data that was not available at the time of our study.

Furthermore, as now clearly stated in the introduction (lines 87-91 of the revised text), our study focuses on spring and summer seasons due to their particular irradiation conditions, characterized by higher SSR levels, lower cloud influence, and higher aerosol loads, that facilitate the evaluation of the influence of aerosol anthropogenic emissions on SSR variability. Therefore, while the quantification of the cloud fraction's impact on SSR is an interesting prospect for future works, it was deemed beyond the scope of our study, which specifically aims to characterize the influence of aerosols on SSR variability during seasons with high aerosol loads and lower cloud influence.

***Figures 8 and 9: Would be nice to include (maybe even only in the legend of the figures) to what period (years) the mid term and long term refer to.***

The following sentence has been added to both figures 8 and 9 (see Figures 9 and 10 of the revised manuscript):

“The designation “Mid term” represents future changes projected under each scenario for the period 2045-2054, while “Long term” refers to the period 2091-2100.”

***Table 3 a): The sum of each component of the SSP1-1.9 scenario does not correspond to the total value displayed in the table. I think there is one zero missing in the value for sulfate.***

Indeed, zeros were missing for the mean AOD at 550 nm reported for the sulfate aerosols under SS1-1.9 in spring. Thank you for noticing. The manuscript has been changed accordingly (see Table 3a of the revised manuscript, page 23).

***Lines 448-482: This paragraph was a little bit hard to read, especially the second half of it. It is also very long. Maybe would be good to reorganize in shorter paragraphs trying to be clearer.***

Lines 448-482 have been modified for clarity (see lines 499-532 of the revised manuscript).

The paragraph has been reorganized in shorter paragraphs.



Contextual formulations (e.g. springtime, summertime, for SSPX-Y scenario, etc.) have been added to facilitate comprehension of the paragraph.

Also, this paragraph has been clarified following the next comment.

The modified paragraph is transcribed below (changes are in bold text):

“Considering the spring season, ALADIN simulations predict a rather weak future evolution of the **all-sky SSR** for the SSP1-1.9 scenario, which is only significant by the end of the century. **For this scenario, ALADIN simulations project** ” spatially limited increases of around +5 to +10 **W.m<sup>-2</sup>** over the south-west of England region

and south-east parts of the BNF region (**Fig. 9a**). Conversely, **for the SSP3-7.0 scenario**, ALADIN predicts more pronounced and widespread decreases of all-sky SSR **for this season (Fig. 9a)**, which are **already** statistically significant from the middle of the century over most of the BNF region (-10 to -15 **W.m<sup>-2</sup>**). These large decreases of SSR reach maximum values at the end of the century, with a maximum diminution of around -25 **W.m<sup>-2</sup>** over the Benelux region, i.e., 8% decrease compared to the historical period 2005-2014 (leftmost panel of Fig. 9a). **Further analysis of** ALADIN simulations suggest that the projected **springtime** decrease in SSR for SSP3-7.0 may be linked to a significant increase in cloud fraction of about +2 to +4% over a large portion of the BNF region, with maximum values around the north of France and Benelux regions (**Fig. 10a**). Note that the increase in cloud fraction coincides with a decrease in the frequency **of** clear-sky situations of around -2 to -3% over the Hauts-de-France and Benelux regions (**Fig. S8a**).

ALADIN simulations for SSP3-7.0 predict a significant increase of the AOD over the BNF region **in spring**, with values ranging from about +0.01 to +0.05, and maximum changes over the north of France and Benelux regions, both for 2050 and 2100 (**Fig. 10b**). **This increase** is mostly related to a rise in ammonium nitrate aerosols, which compensates a decrease in sulfate, organic and black carbon aerosols (Table 3a). As shown Table S2a, these evolutions cause a near to 10% increase of the contribution of nitrate aerosols to the total AOD under SSP3-7.0, rising from 46.5% to 55-56%. These results are consistent with the projected changes in aerosol and their precursor emissions in Europe for the SSP3-7.0 scenario, with a significant increase in ammonia emissions up to 2100 and a slow decrease in other species, notably SO<sub>2</sub>, BC and OC (Fig. 2). The results of the sensitivity study of Chesnoiu et al. (2024b) reported in Table S3 allow the quantification of the average impact of an increase in AOD on cloud-free SSR over the BNF region **when multiplied by the future changes in AOD projected by ALADIN**. This approach suggests that the increase **of around +0.01 and +0.05 in AOD simulated by ALADIN in spring under SSP3-7.0** would induce a limited decrease in SSR (in the absence of clouds) of around -2 to -8 **W.m<sup>-2</sup>**.

**ALADIN spring simulations for SSP3-7.0 also highlight a rather homogeneous increase of PRW of around +0.1 in 2050 and +0.3 cm in 2100 (Fig. 10c). These increases in PRW are related to coincident rises in simulated surface temperatures, especially at the end of the century (+1.5 to +2°C, Fig. S9a). Following the approach described previously for the AOD based on the results of the sensitivity study of Chesnoiu et al. (2024b) reported in Table S3, we find that the range of future PRW evolution simulated by ALADIN would lead to an additional decrease in cloud-free SSR of about -2 to -5 W.m<sup>-2</sup>.**

**Consistently, the overall decrease of SSR<sub>cf</sub> simulated by ALADIN for SSP3-7.0 in spring reach -3 to -7 W.m<sup>-2</sup> in 2050 and -8 to -12 W.m<sup>-2</sup> in 2100 (Fig 9c), reflecting the combined effects of aerosols and water vapor. Interestingly, our springtime simulations for SSP3-7.0 show stronger decreases of all-sky SSR (compared to cloud-free SSR), due to the additional contribution of increasing cloud fraction over most of the BNF region (right panels of Figure 9a and 10a). In addition, the increase in CLT, and to a lesser extent in AOD, also results in a fairly significant increase in the proportion of diffuse irradiance, which can reach +2 to +4% over large areas covering the north of France and Benelux regions (Fig. 9a).**

***Lines 469-470: The authors refer to the change in SSR that would be induced by some changes in AOD. Is this the change that was observed in the scenarios simulated? This was not too clear.***

The changes in SSR induced by changes in AOD discussed lines 469-470 are not directly simulated by the model. Instead, these changes are derived by multiplying future changes in AOD projected by ALADIN and mean sensitivities of cloud-free SSR to various parameters (e.g. AOD, PRW, SSA, etc.) from Chesnoiu et al. 2024b. The benefit of this approach is that it can be applied to future changes in AOD (lines 469-470) as well as changes in PRW (lines 474-475).

Overall, as mentioned lines 475-477 of the initial manuscript: “*These estimates*” (i.e. changes in SSR<sub>cf</sub> estimated using the method described above) “*are consistent with ALADIN simulations of SSR<sub>cf</sub> (Figures 8c) under SSP3-7.0, with an overall decrease of about -3 to -7 W/m<sup>2</sup> in 2050 and -8 to -12 W/m<sup>2</sup> in 2100, reflecting the combined effects of aerosols and water vapor.*” This approach has also been used to quantify the contribution of changes in AOD and PRW to the future evolution of SSR<sub>cf</sub> for SSP1-1.9 (lines 504-506 of the initial manuscript), and gave satisfactory results.

For clarity, lines 468-477 have been changed (see lines 517-528 of the revised manuscript) as shown in the previous response.

**Conclusions: If any of the major concerns raised here are somehow addressed, it would be important to discuss them in this section too.**

It is true that developments related to the comments of both referees should be addressed in the conclusions.

As the focus on the spring and summer seasons is now properly defined in the introduction, no particular comments have been added in the conclusions regarding the analysis of winter and autumn seasons.

In summary, only a few words have been included relative to the analysis of monthly anomalies over the period 2010-2020 (Section 3.4) added in the revised version of Section 3 (see line 631 of the revised manuscript).

### **Technical comments**

**Line 27: This first sentence sounds odd. I would change “should not be considered stable over past and upcoming decades” to something like “has not been stable over the past decades and should not be expected to be in the upcoming decades”.**

The sentence has been corrected as advised (see lines 28-29 of the revised manuscript).

**Line 34: This first sentence (before comma) sounds confusing, I had to reread to understand. Maybe replace “energy transition that requires increases of pv technology deployment” with something shorter or more objective as simply “PV energy production” or “PV energy production (relevant for energy transition)”.**

Following the referee’s advice, the sentence has been changed as follows (see lines 36-37 of the revised manuscript, changes are in bold text):

“In the context of climate change that requires **an increase of photovoltaic energy production (relevant for the energy transition),[...]**”

**Line 53: By “cloudy sky conditions” you meant “cloud cover”?**

Yes. The term “cloudy sky conditions” has been changed to “cloud cover” for clarity (see line 66 of the revised manuscript).

**Line 64: “Cloudy conditions” or “cloud cover”? Maybe you want to use a synonym of cloud cover, such as “cloudiness conditions”.?**

We meant “cloud cover”. The term “cloudy conditions” has been changed to “cloud cover” for clarity (see lines 77 of the revised manuscript).

**Line 170: “Scenarios is” - either “scenario is” or “scenarios are”. Maybe also double check this throughout the manuscript.**

There was an extra “s”. The appropriate spelling should read “the SSP1-1.9 scenario is [...]”. The text has been modified accordingly (see line 187 of the revised text) and the rest of the manuscript has been double checked.

**Line 227: Maybe also good to include the relative (%) values for the AOD uncertainty.**

Careful review of reference AERONET publications suggests that there is no average relative uncertainty value for AERONET AOD measurements.

From the most recent publication of Giles et al. (2019) regarding version 3 of the AERONET database:

***“Bias and uncertainty estimates for near-real-time AOD are computed by using the difference of the pre-field calibration AOD minus the interpolated calibration AOD. The near-real-time AERONET data have an estimated bias of up to +0.02 and 1 $\sigma$  uncertainty of up to 0.02; these values have slightly higher uncertainty for shorter wavelengths and slightly lower uncertainty for longer wavelengths.”***

This is in accordance with the uncertainty given line 227 of the initial manuscript.

**Reference:** Giles, D. M., Sinyuk, A., Sorokin, M. G., Schafer, J. S., Smirnov, A., Slutsker, I., Eck, T. F., Holben, B. N., Lewis, J. R., Campbell, J. R., Welton, E. J., Korkin, S. V., and Lyapustin, A. I.: Advancements in the Aerosol Robotic Network (AERONET) Version 3 database – automated near-real-time quality control algorithm with improved cloud screening for Sun photometer aerosol optical depth (AOD) measurements, *Atmospheric Measurement Techniques*, 12, 169–209, <https://doi.org/10.5194/amt-12-169-2019>, 2019.

**Line 485: Same as line 170.**

The extra “s” has been removed. The sentence now reads “significant for this scenario due to [...]” (see line 536 of the revised manuscript).
